# Supplementary material for: Design and analysis of in-plane and out-of-plane heterostructures based on monolayer tri-G with enhanced photocatalytic property for water splitting
Source: Royal Society of Chemistry journal article supplement (doi:10.1039/d2cp03273b), 2022-12-07
Supplement: d2cp03273b1.pdf [file d2cp03273b1.pdf]

## Design and analysis of in-plane and out-of-plane heterostructures based on monolayer tri-G with enhanced photocatalytic property for water splitting

Huijuan Wang<sup>a</sup>, Xiaole Zheng<sup>a</sup>, Xinxin Li<sup>a</sup>, Linxin He<sup>a</sup>, Jiasen Guo<sup>a</sup>, Ying Chen<sup>a</sup>, Hua Lin<sup>a</sup>,  
Jianfeng Tang<sup>a</sup>, Chunmei Li<sup>a,\*</sup>

<sup>a</sup> School of Materials and Energy, Southwest University, Chongqing 400715, China.

E-mail: [lcm1998@swu.edu.cn](mailto:lcm1998@swu.edu.cn)

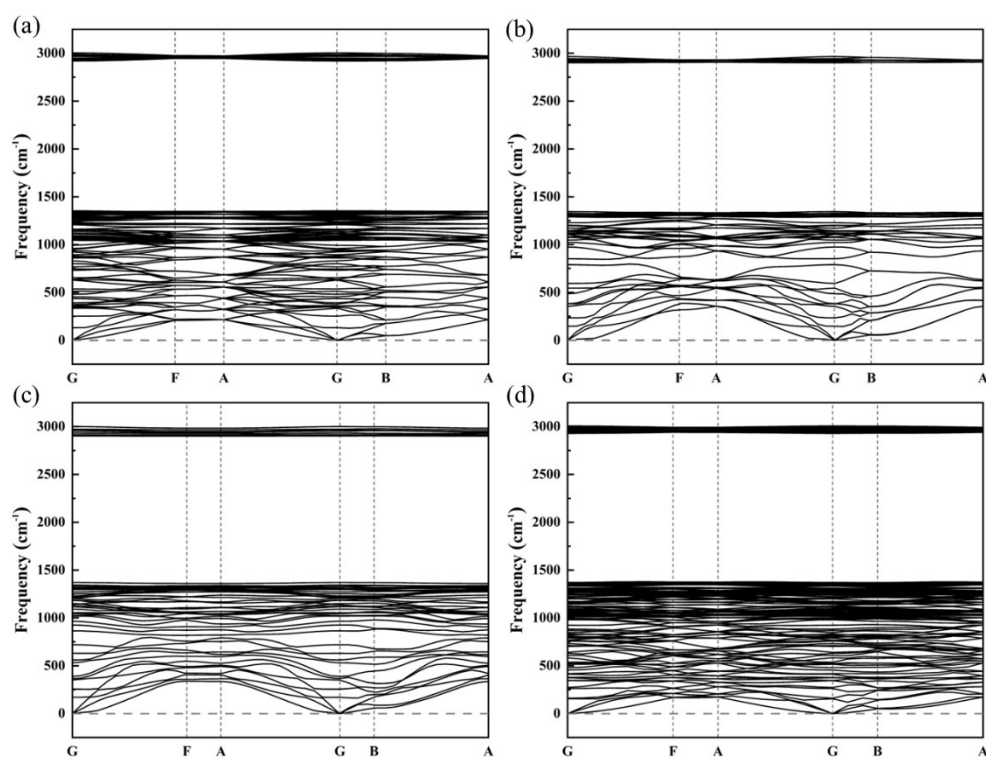

**Fig. S1** Calculated phonon dispersions of four graphene conformers, (a) tri-G-A, (b) tri-G-B, (c) tri-G-C and (d) tri-G-D.

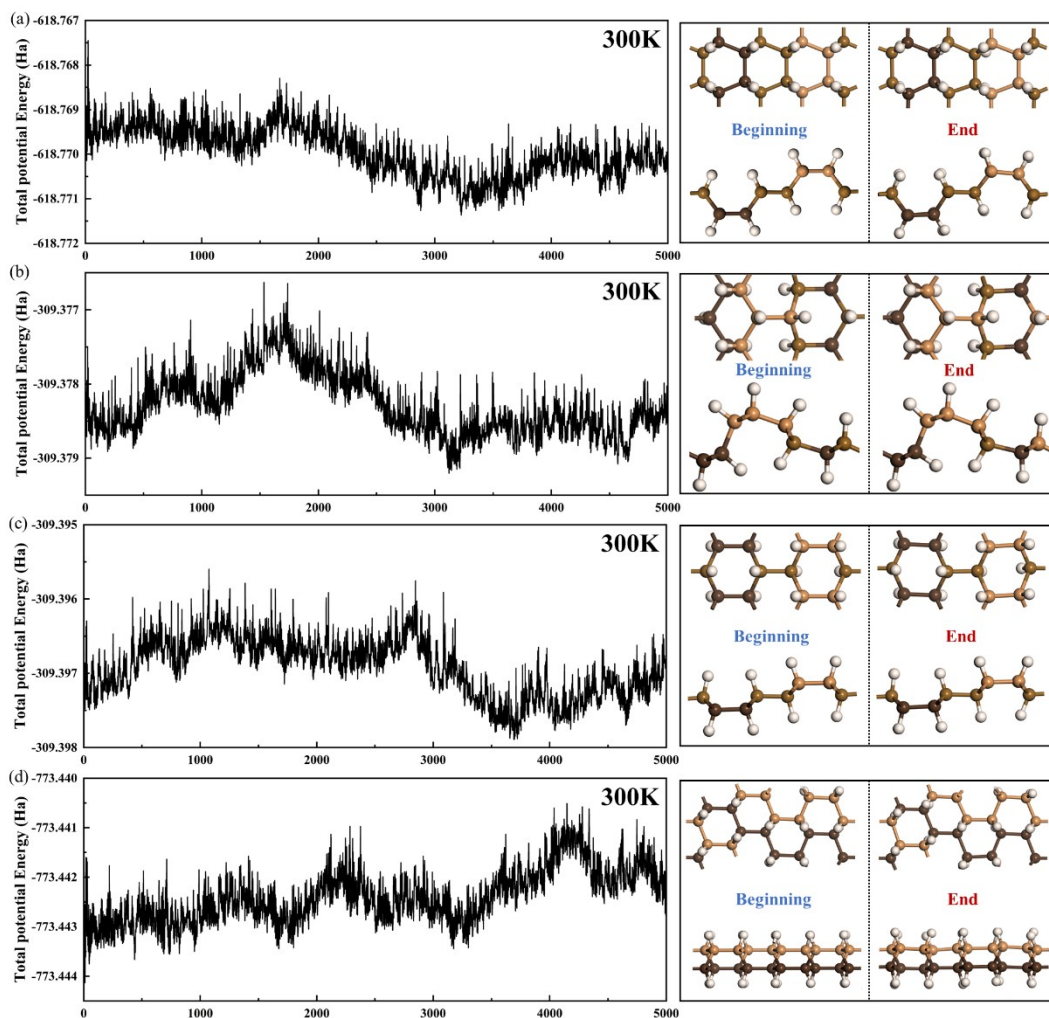

**Fig. S2** The time-dependent potential energy fluctuation in (a) tri-G-A, (b) tri-G-B, (c) tri-G-C and (d) tri-G-D.

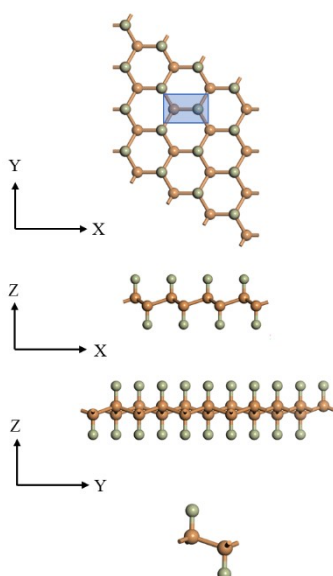

**Fig. S3** Graphic structures of cha-G. Top view, side views, and the repetitive unit. Brown spheres indicate the C atoms while green spheres indicate H atoms.

## S1 Absorption coefficient $I(\omega)$

The absorption coefficient  $I(\omega)$  can be derived from the real part  $\varepsilon_1(\omega)$  and the imaginary part  $\varepsilon_2(\omega)$  of the dielectric function, which is given by

$$I(\omega) = \left[ \sqrt{2\omega(\sqrt{\varepsilon_1(\omega)^2 - \varepsilon_2(\omega)^2} - \varepsilon_1(\omega))} \right]^{\frac{1}{2}}$$

In addition to above formula, the absorption coefficient can also be calculated by  $\alpha(\omega) = k(2\omega/c)$ , where  $k$  is the extinction coefficient.

**Table S1** The bond populations of tri-G-A, tri-G-B, tri-G-C and tri-G-D.

|     | tri-G-A | tri-G-B | tri-G-C | tri-G-D |
|-----|---------|---------|---------|---------|
| C-H | 0.91    | 0.84    | 0.81    | 0.92    |
| C-C | 0.82    | 0.83    | 0.63    | 0.74    |

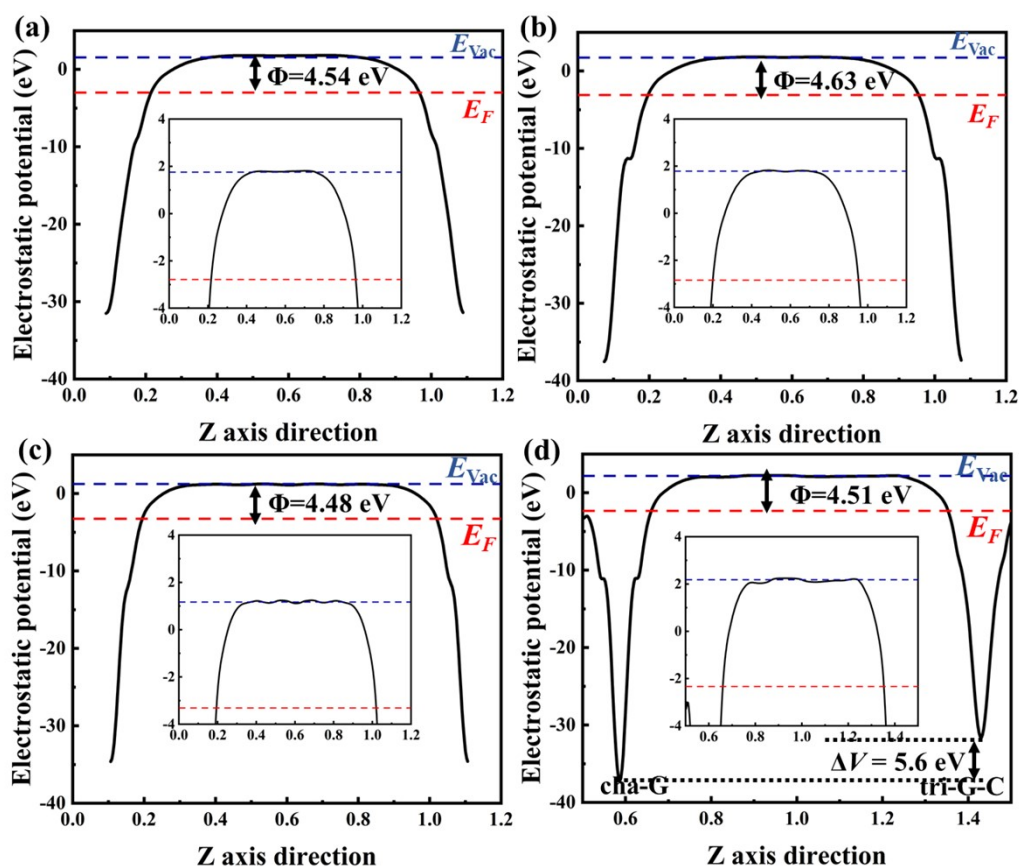

**Fig. S4** (a-d) The estimated work functions of the individual tri-G-C, cha-G monolayers and tri-G-C/cha-G in-plane and out-of-plane heterostructures, respectively.

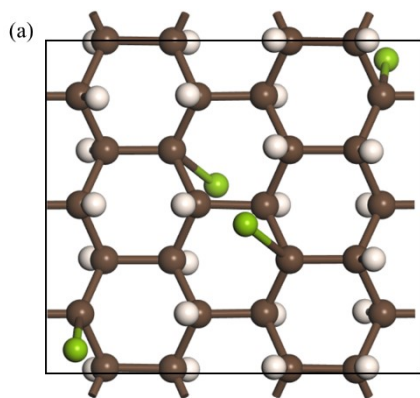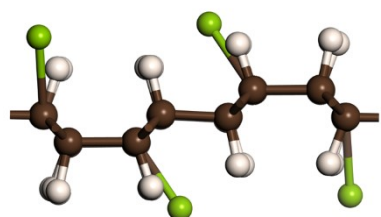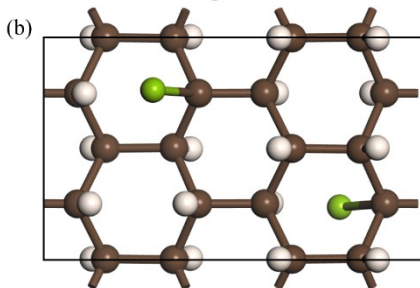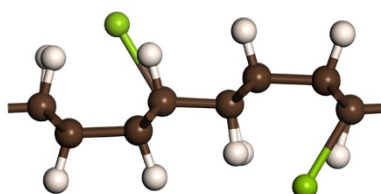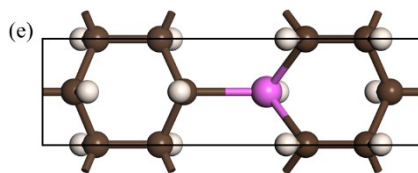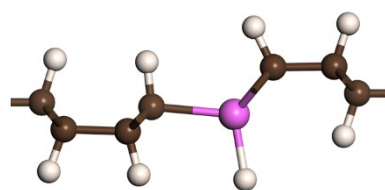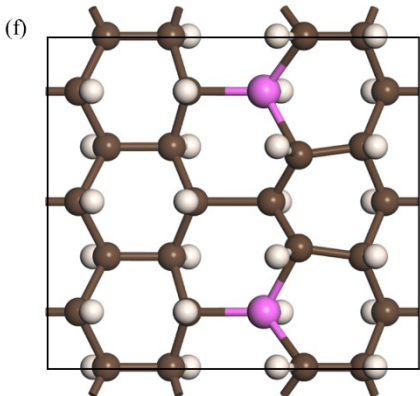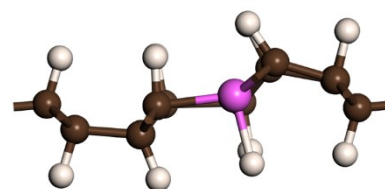

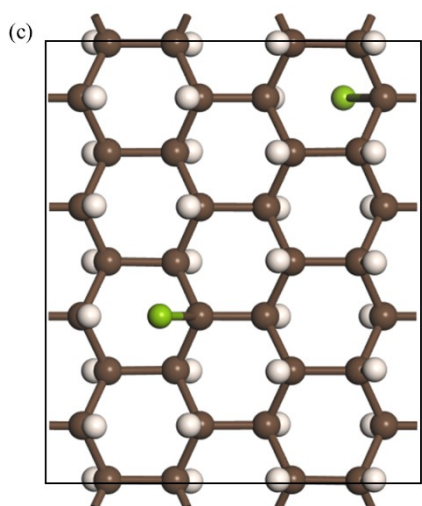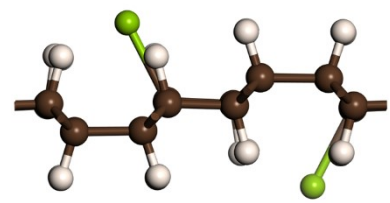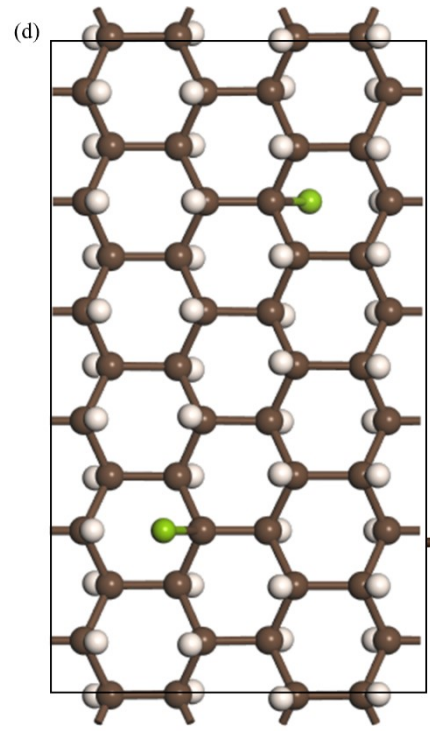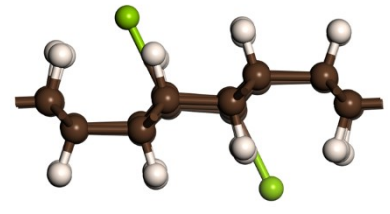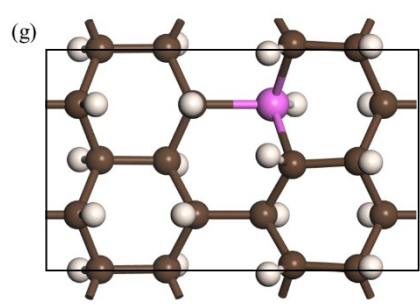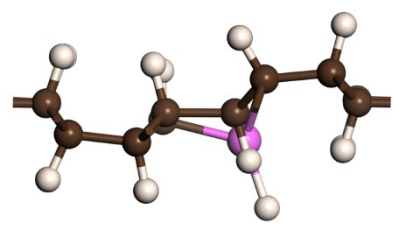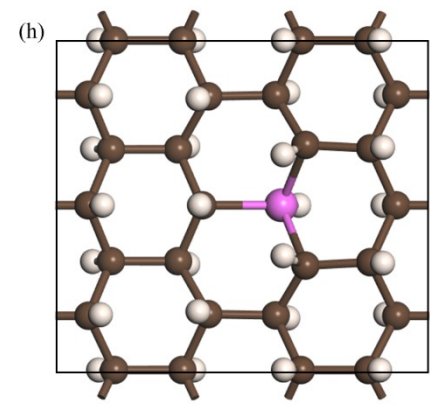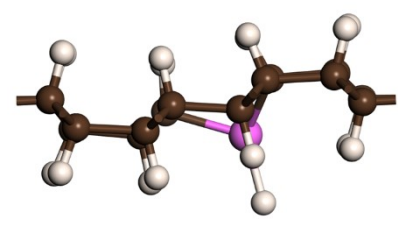

● H    ● Li    ● C    ● Al

**Fig. S5** The top and side views of optimized structures. Li-doped tri-G-C with the doping concentrations (atomic ratios) of (a) 8.33%, (b) 6.25%, (c) 3.13% and (d) 2.08%; Al-doped tri-G-C with the doping concentrations of (e) 6.25%, (f) 4.17%, (g) 3.13% and (h) 2.08%.

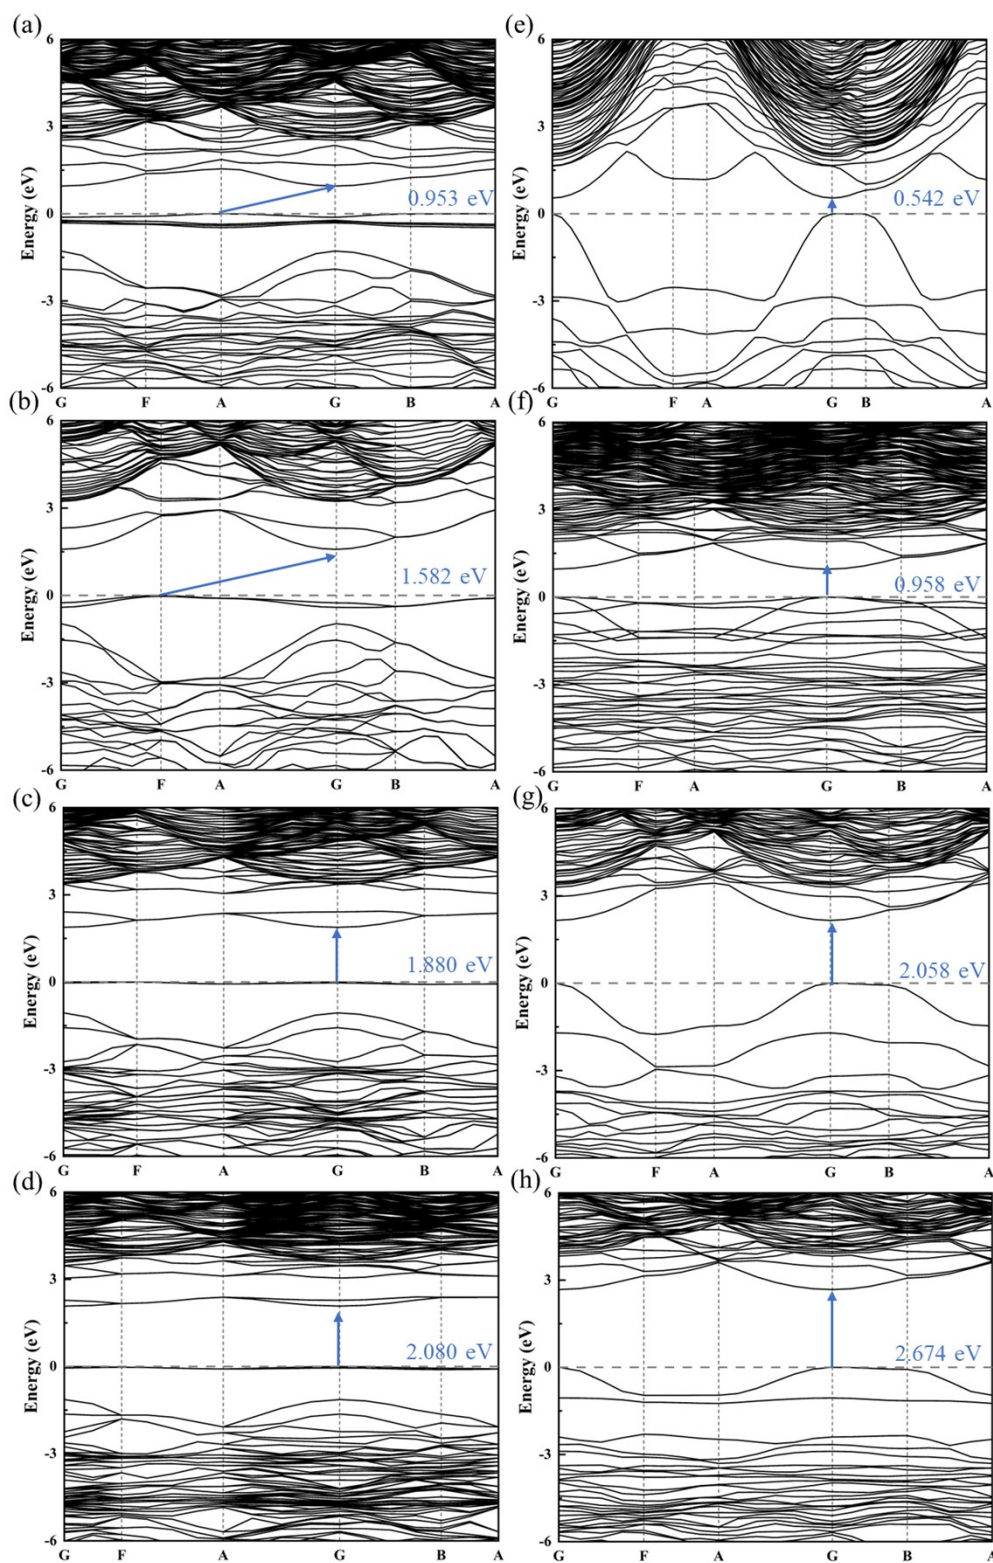

**Fig. S6** Band structures of optimized models in HSE06. Li-doped tri-G-C with the doping concentrations (atomic ratios) of (a) 8.33%, (b) 6.25%, (c) 3.13% and (d) 2.08%; Al-doped tri-G-C with the doping concentrations of (e) 6.25%, (f) 4.17%, (g) 3.13% and (h) 2.08%.

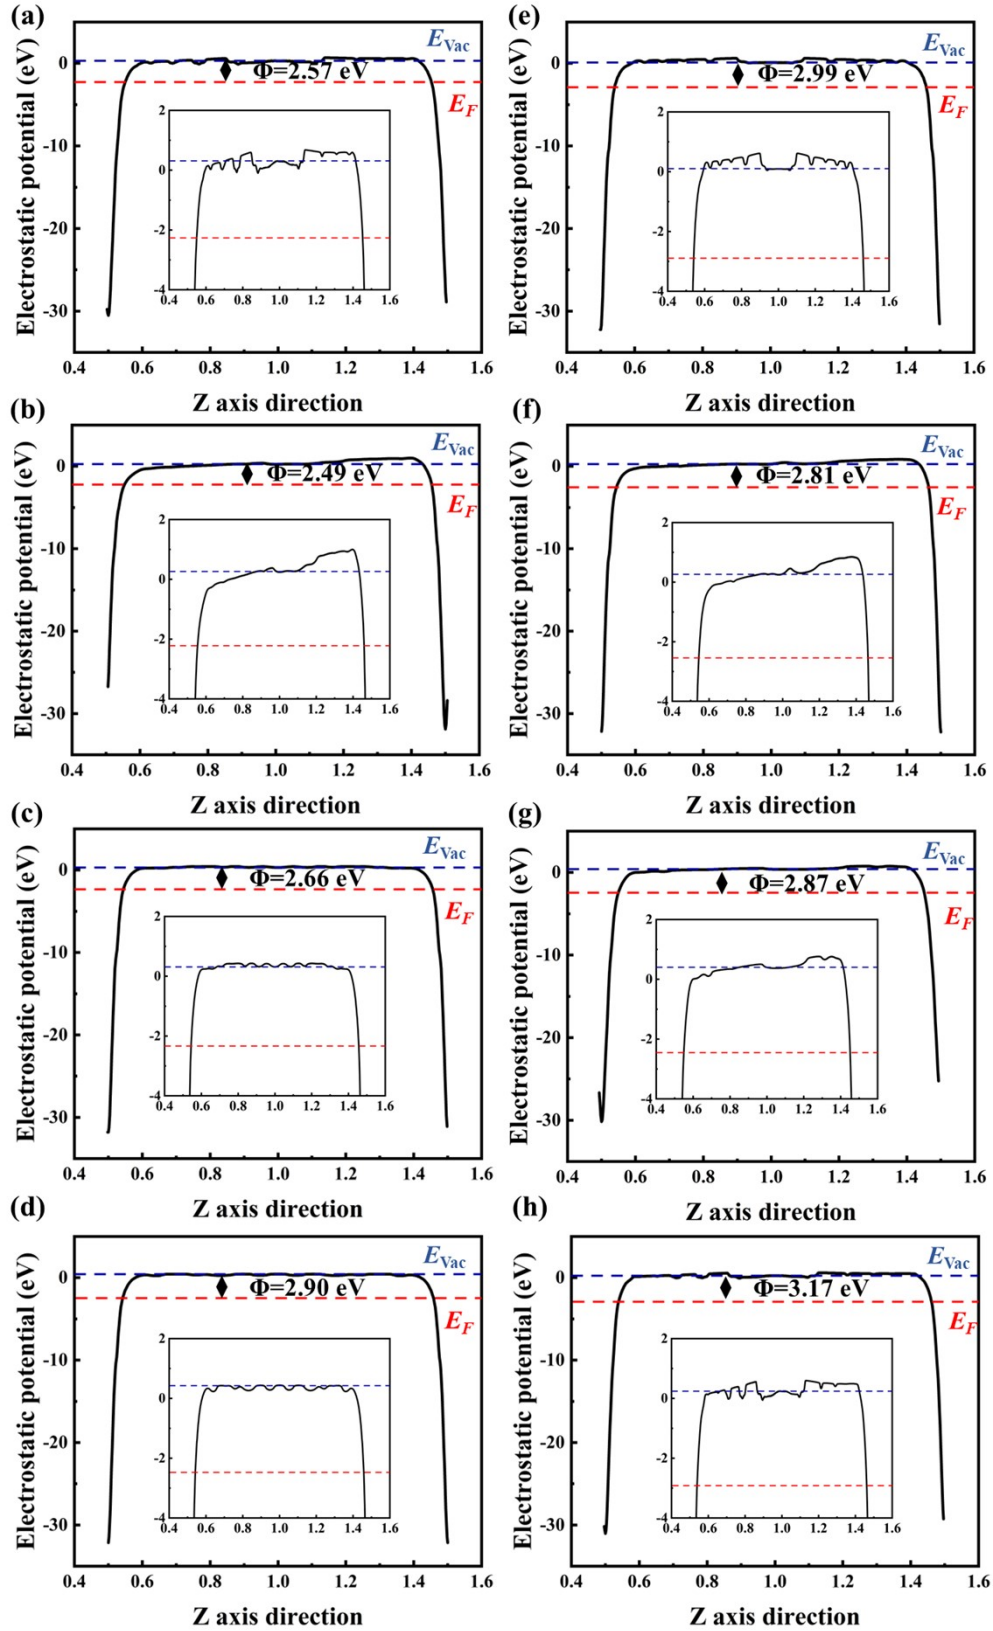

**Fig. S7** The estimated work functions of Li-doped and Al-doped tri-G-C. Li-doped tri-G-C with the doping concentrations (atomic ratios) of (a) 8.33%, (b) 6.25%, (c) 3.13% and (d) 2.08%; Al-doped tri-G-C with the doping concentrations of (e) 6.25%, (f) 4.17%, (g) 3.13% and (h) 2.08%.

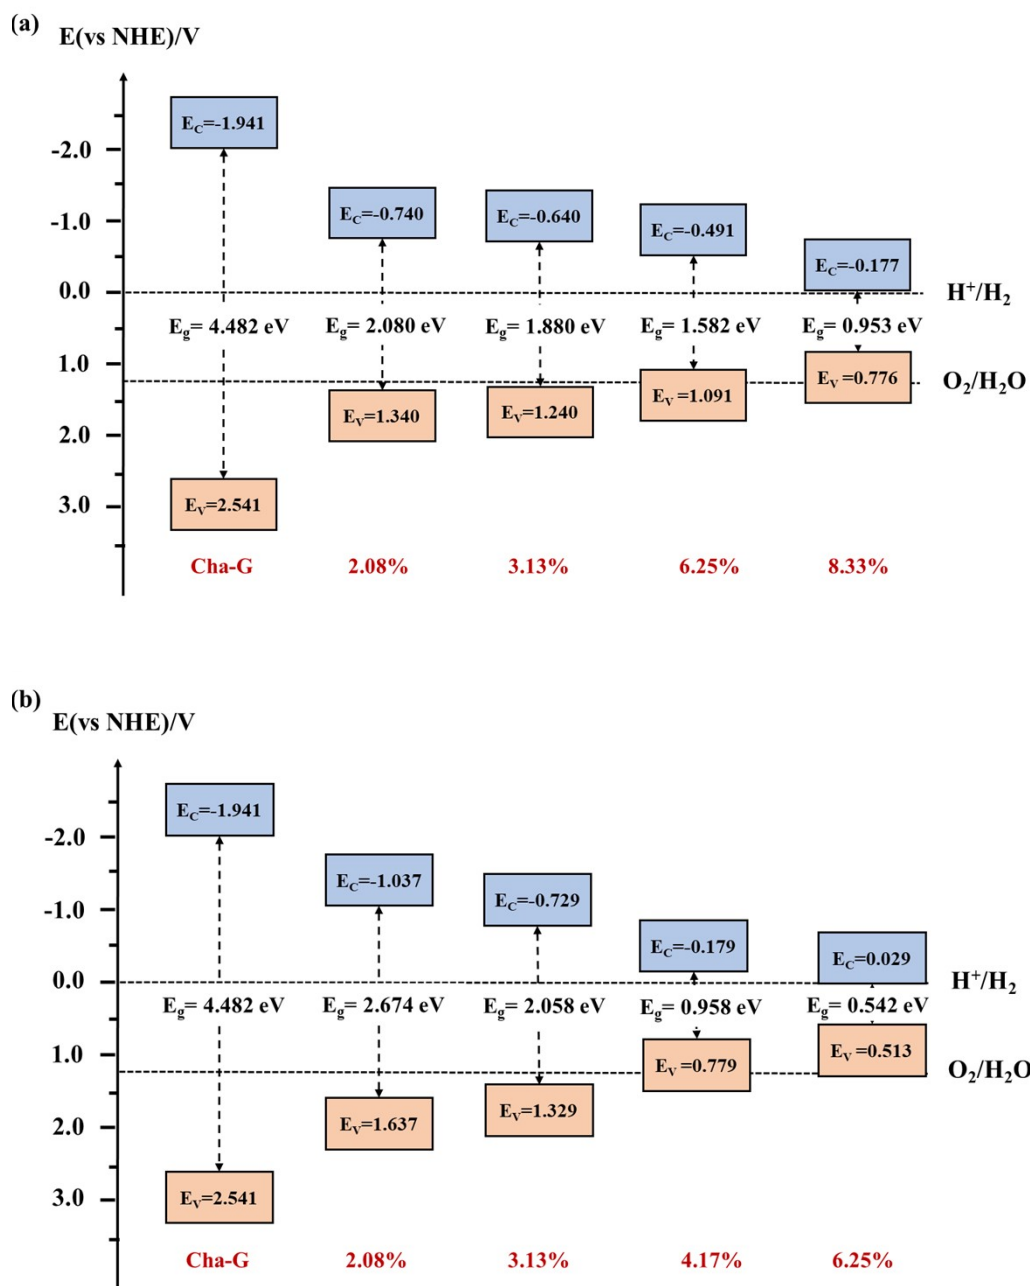

**Fig. S8** (a) Band-edge positions of cha-G and Li-doped tri-G-C with the doping concentrations (atomic ratios) of 2.08%, 3.13%, 6.25% and 8.33%; (b) Band-edge positions of cha-G and Al-doped tri-G-C with the doping concentrations of 2.08%, 3.13%, 4.17% and 6.25%.



**Table S2** Effective masses of electrons and holes in different doped tri-G-C.

|          |       | $m_e^*/m_0$ | $m_h^*/m_0$ | $D = m_h^*/m_e^*$ | $D = m_e^*/m_h^*$ |
|----------|-------|-------------|-------------|-------------------|-------------------|
| Li-doped | 8.33% | 1.313       | 3.708       | 2.824             | 0.354             |
|          | 6.25% | 1.108       | 3.433       | 3.098             | 0.323             |
|          | 3.13% | 1.156       | 3.906       | 3.378             | 0.296             |
|          | 2.08% | 1.347       | 3.748       | 2.783             | 0.359             |
| Al-doped | 6.25% | 0.635       | 6.163       | 9.702             | 0.103             |
|          | 4.17% | 1.181       | 2.576       | 2.182             | 0.458             |
|          | 3.13% | 1.284       | 4.852       | 3.779             | 0.265             |
|          | 2.08% | 1.173       | 4.385       | 3.739             | 0.267             |
